# Supplementary material
Source: PubMed Central journal article supplement (PMC4097035)
Supplement: NIHMS558215-supplement-Supp_tableS1_figuresS1-S5.pdf [file NIHMS558215-supplement-Supp_tableS1_figuresS1-S5.pdf]

**Table S1: List of bacterial strains, plasmid vectors and primers used in this study.**

| <b>Francisella Strains</b>                                    |  | <b>Genotype</b>                                                                                                         | <b>Source</b>                                                                  |
|---------------------------------------------------------------|--|-------------------------------------------------------------------------------------------------------------------------|--------------------------------------------------------------------------------|
| <i>F. tularensis</i> LVS                                      |  | Wild type strain                                                                                                        | ATCC                                                                           |
| $\Delta tolC$ mutant                                          |  | Deletion mutant of <i>F. tularensis</i> LVS <i>tolC</i> gene                                                            | (Gil <i>et al.</i> , 2006)                                                     |
| <i>acrB</i> mutant                                            |  | <i>F. tularensis</i> LVS, <i>acrB</i> ::Tn5, Kan <sup>r</sup>                                                           | This Study                                                                     |
| <i>secA</i> mutant                                            |  | <i>F. tularensis</i> LVS, <i>secA</i> ::EZ::Tn, Kan <sup>r</sup>                                                        | (Su <i>et al.</i> , 2007)                                                      |
| <i>secE</i> mutant                                            |  | <i>F. tularensis</i> LVS, <i>secB</i> ::EZ::Tn, Kan <sup>r</sup>                                                        | (Su <i>et al.</i> , 2007)                                                      |
| $\Delta KatG$ mutant                                          |  | Deletion mutant of <i>F. tularensis</i> LVS catalase gene                                                               | (Lindgren <i>et al.</i> , 2007)                                                |
| $\Delta KatG$ + p $\Delta SKatG$                              |  | $\Delta KatG$ mutant transcomplemented with p $\Delta SKatG$ lacking putative <i>KatG</i> signal sequence               | This Study                                                                     |
| <i>emrA1</i> mutant                                           |  | <i>F. tularensis</i> LVS, <i>FTL_0687</i> ::Tn5, Kan <sup>r</sup>                                                       | This Study                                                                     |
| <i>emrA1</i> transcomplement ( <i>emrA1</i> + <i>pemrA1</i> ) |  | <i>F. tularensis</i> LVS, <i>FTL_0687</i> ::Tn5, (pMP822+ <i>FTL_0687</i> ), Kan <sup>r</sup> , Hygro <sup>r</sup>      | This Study                                                                     |
| <i>SodB</i> mutant                                            |  | Point mutant of <i>F. tularensis</i> LVS Fe-SOD gene                                                                    | (Bakshi <i>et al.</i> , 2006)                                                  |
| <i>SodBC</i> mutant                                           |  | Point mutant of <i>F. tularensis</i> LVS Fe-SOD gene and deletion mutant of Cu-ZnSOD gene                               | (Melillo <i>et al.</i> , 2009)                                                 |
| <b><i>E. coli</i> Strains</b>                                 |  |                                                                                                                         |                                                                                |
| DH5 $\alpha$                                                  |  | F- $\Phi 80lacZ\Delta M15 \Delta(lacZYA-argF)$ U169 <i>recA1 endA1 hsdR17</i> (rK-, mK+)                                | Invitrogen                                                                     |
| ME006                                                         |  | <i>phoA supE44</i> $\lambda$ - <i>thi-1 gyrA96 relA1</i> DH5 $\alpha$ with pMP822+ <i>FTL_0687</i> , Hygro <sup>r</sup> | This Study                                                                     |
| <b>Plasmids</b>                                               |  |                                                                                                                         |                                                                                |
| pMOD3                                                         |  | EZ::Tn5, Kan <sup>r</sup>                                                                                               | Epicentre                                                                      |
| pMP822                                                        |  | <i>E. coli</i> - <i>Francisella</i> shuttle vector, Hygro <sup>r</sup>                                                  | (LoVullo <i>et al.</i> , 2006)                                                 |
| pMM001                                                        |  | pMP822 + <i>FTL_0687</i> , Hygro <sup>r</sup>                                                                           | This Study                                                                     |
| p $\Delta SKatG$                                              |  | pMP822 + $\Delta SKatG$ lacking putative <i>KatG</i> signal sequence, Hygro <sup>r</sup>                                | This Study                                                                     |
| <b>Primers</b>                                                |  | <b>Sequence</b>                                                                                                         | <b>Purpose</b>                                                                 |
| Sqfp                                                          |  | 5'-GCCAACGACTACGCACTAGCCAAC-3'                                                                                          | Forward primer for sequencing transposon insertion sites                       |
| Sqrp                                                          |  | 5'-GAGCCAATATGCGAGAACACCCGAGAA-3'                                                                                       | Reverse primer for sequencing transposon insertion sites                       |
| MP003                                                         |  | 5'- AGGGATCCATGTCAGAAGAAAATTACAAC-3'                                                                                    | Forward primer for cloning <i>FTL_0687</i> gene at <i>BamHI</i> site of pMP822 |
| MP004                                                         |  | 5'-CGCTGCAGCTATAATGTATCTACTTTTAC-3'                                                                                     | Reverse primer for cloning <i>FTL_0687</i> gene at <i>PstI</i> site of pMP822  |
| MP015                                                         |  | 5'-AAGCCAAGTTAGTGCTGCATATTT-3'                                                                                          | Forward primer for qRT-PCR of <i>FTL_0686</i>                                  |
| MP016                                                         |  | 5'-AAGCCAAGTTAGTGCTGCATATTT-3'                                                                                          | Reverse primer for qRT-PCR of <i>FTL_0686</i>                                  |

|        |                                 |                                                                                                                   |
|--------|---------------------------------|-------------------------------------------------------------------------------------------------------------------|
| MP019  | 5'-TCCTAATCCCTGAATAGCCGTTGT-3'  | Forward primer for qRT-PCR of <i>FTL_0688</i>                                                                     |
| MP020  | 5'-AGGTGTTGCCGCTATTATTGGTGC-3'  | Reverse primer for qRT-PCR of <i>FTL_0688</i>                                                                     |
| MP029  | 5'-TCGCAGGTTTAGCGAGCTGTTCTA-3'  | Forward primer for qRT-PCR internal control                                                                       |
| MP030  | 5'-ACAGCAGCAGCTTGCTCAGTAGTA-3'  | Reverse primer for qRT-PCR internal control                                                                       |
| MP105  | 5'- CAAGAAATCAACAAACCACCTATC-3' | Forward primer for RT-PCR of <i>FTL_0688-0687</i>                                                                 |
| MP106  | 5'-CAAATTGGTTGTTGTGGATATAGA-3'  | intergenic region (Primer E)<br>Reverse primer for RT-PCR of <i>FTL_0688-0687</i><br>intergenic region (Primer F) |
| MP107  | 5'-AGCCAGGGCAAAAAGTTGAA-3'      | Forward primer for RT-PCR of <i>FTL_0687-0686</i>                                                                 |
| MP 108 | 5'-TTTATCTCAGCATTAGCTTGTAGG-3'  | intergenic region (Primer C)<br>Reverse primer for RT-PCR of <i>FTL_0687-0686</i>                                 |
| MP111  | 5'-GTTACATCTGCTATGGTTTCAACA-3'  | intergenic region (Primer D)<br>Forward primer for RT-PCR of <i>FTL_0688-0689</i>                                 |
| MP112  | 5'-GAGCCATTAGGGGTACTAACATGA-3'  | intergenic region (Primer A)<br>Reverse primer for RT-PCR of <i>FTL_0688-0689</i><br>intergenic region (Primer B) |

# Figure S1

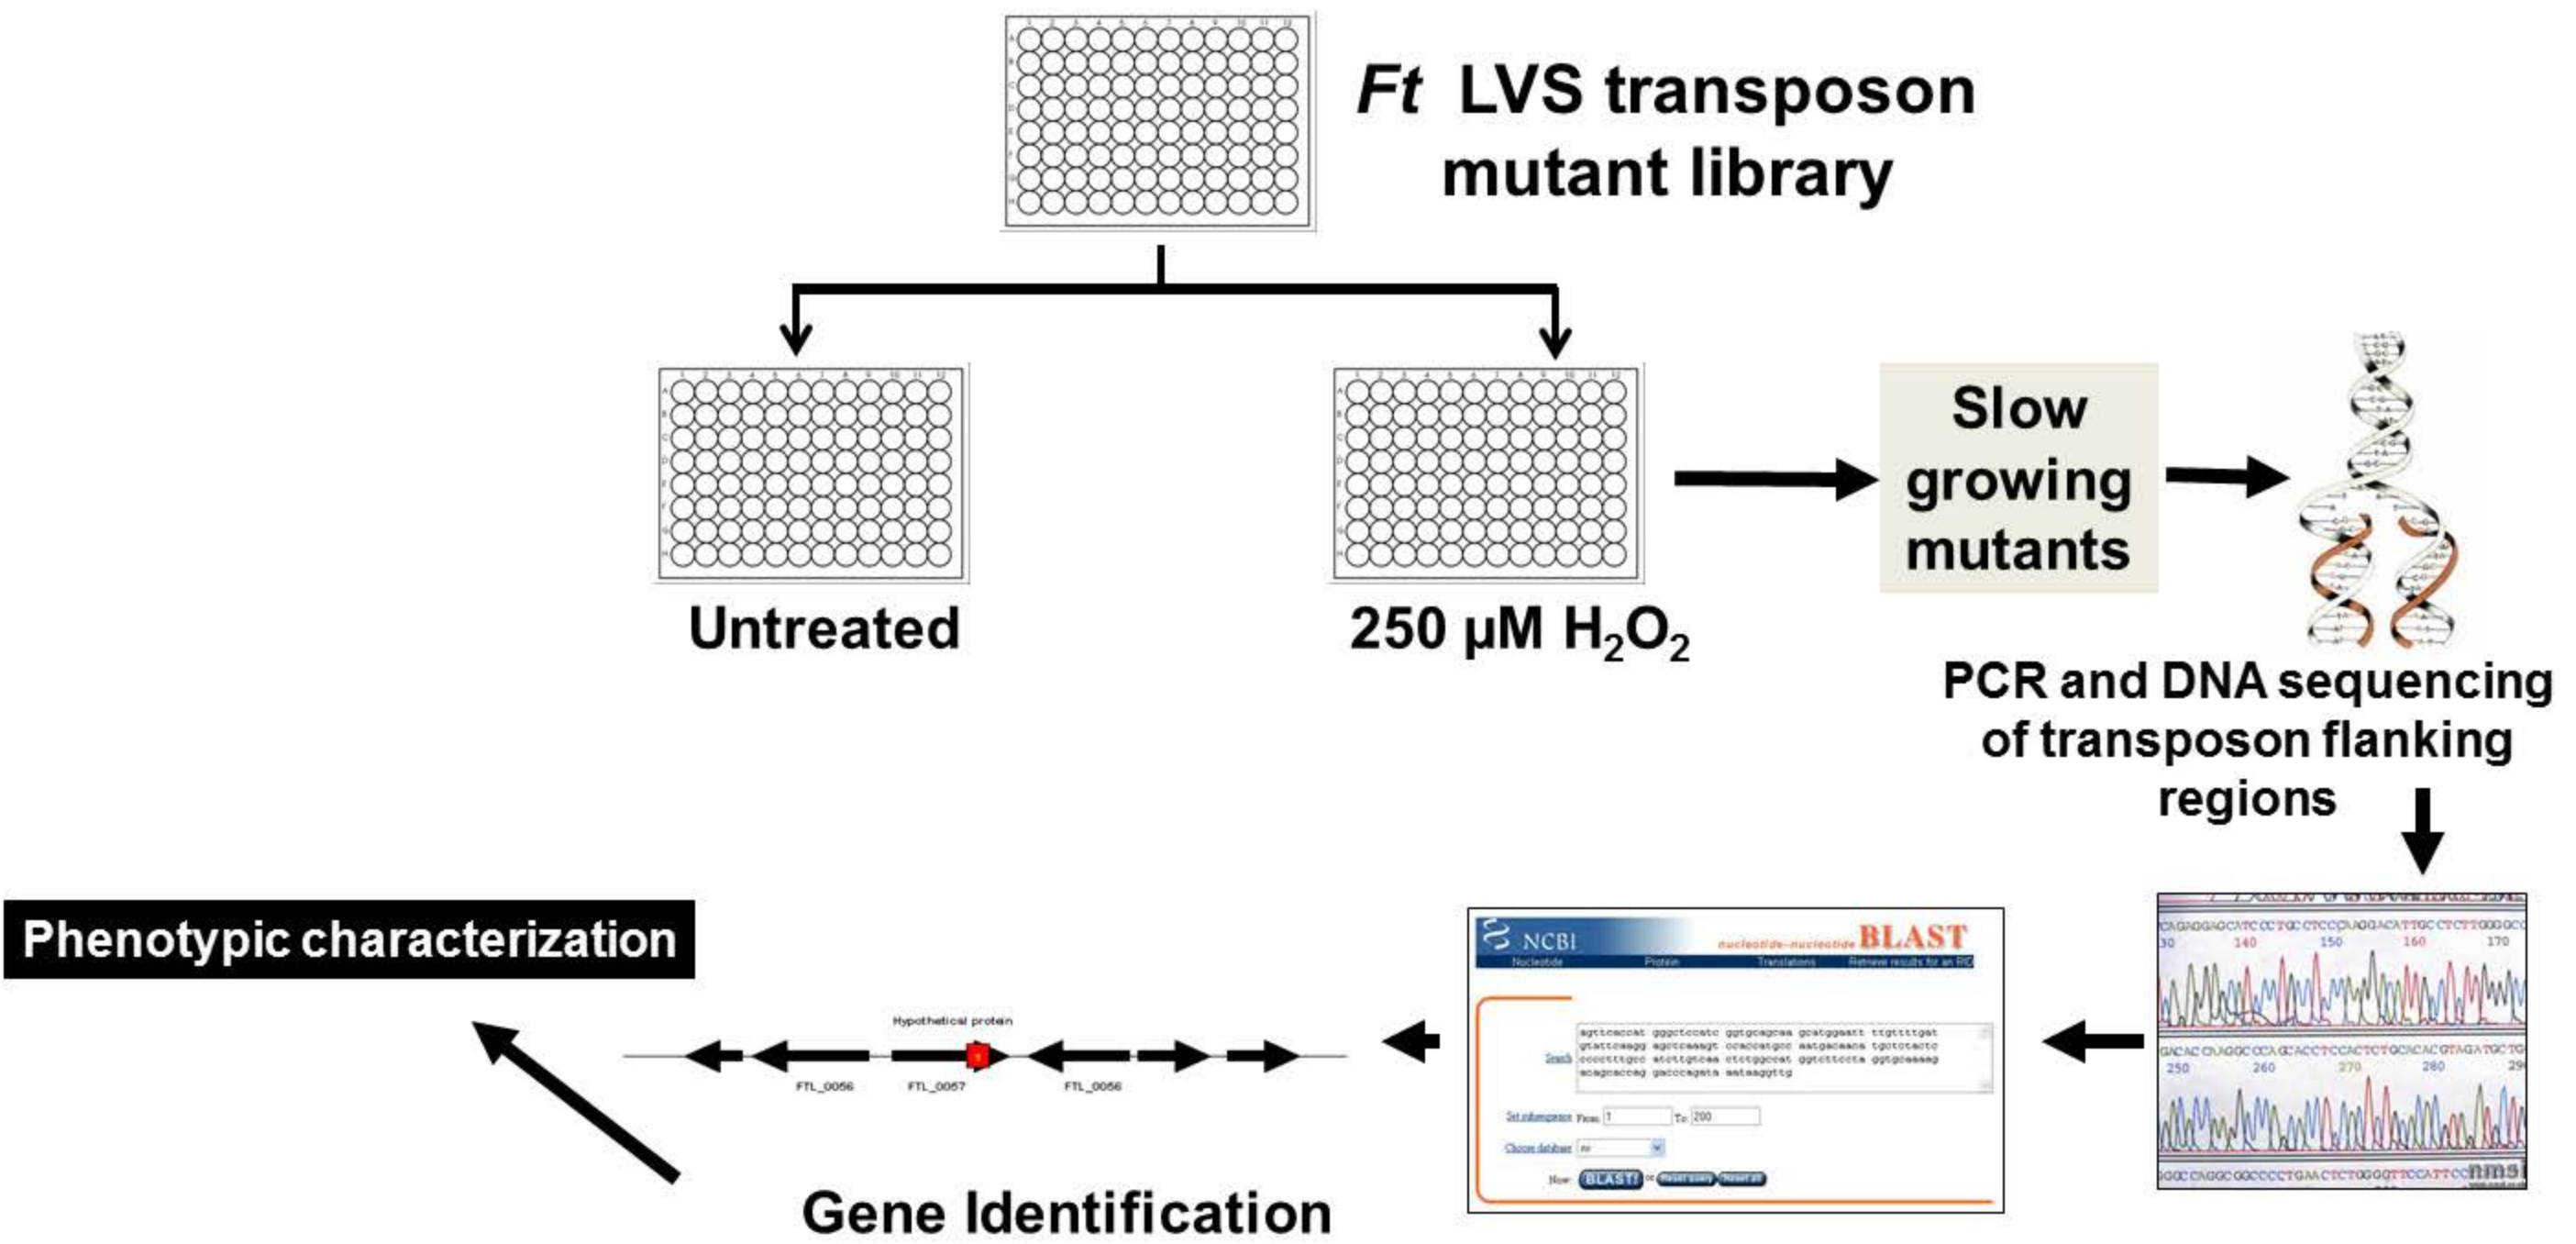

**Fig. S1:** Scheme for screening of transposon mutants of *F. tularensis* LVS for the identification of  $H_2O_2$  sensitive mutants.

# Figure S2

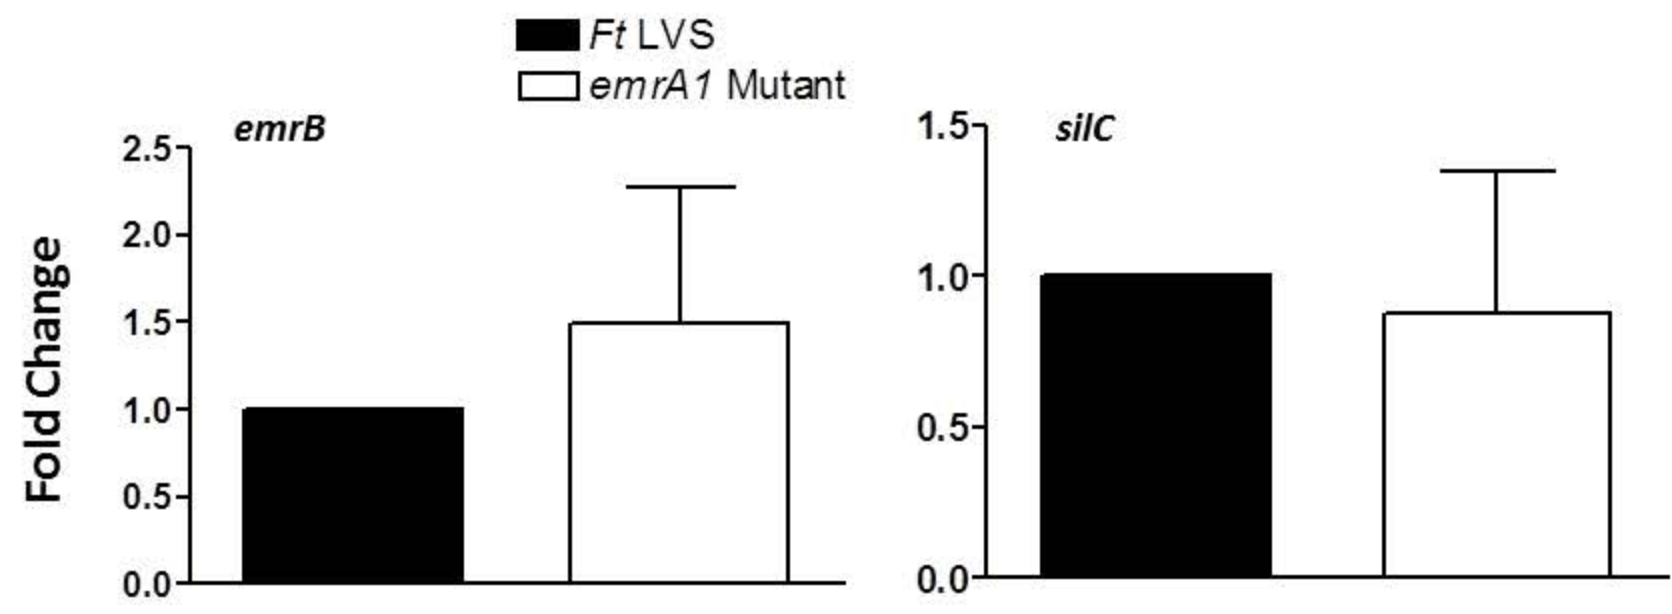

**Fig. S2:** Quantitative RT-PCR analysis of genes upstream (*silC*) and downstream (*emrB*) of the *emrA1* gene.

# Figure S3

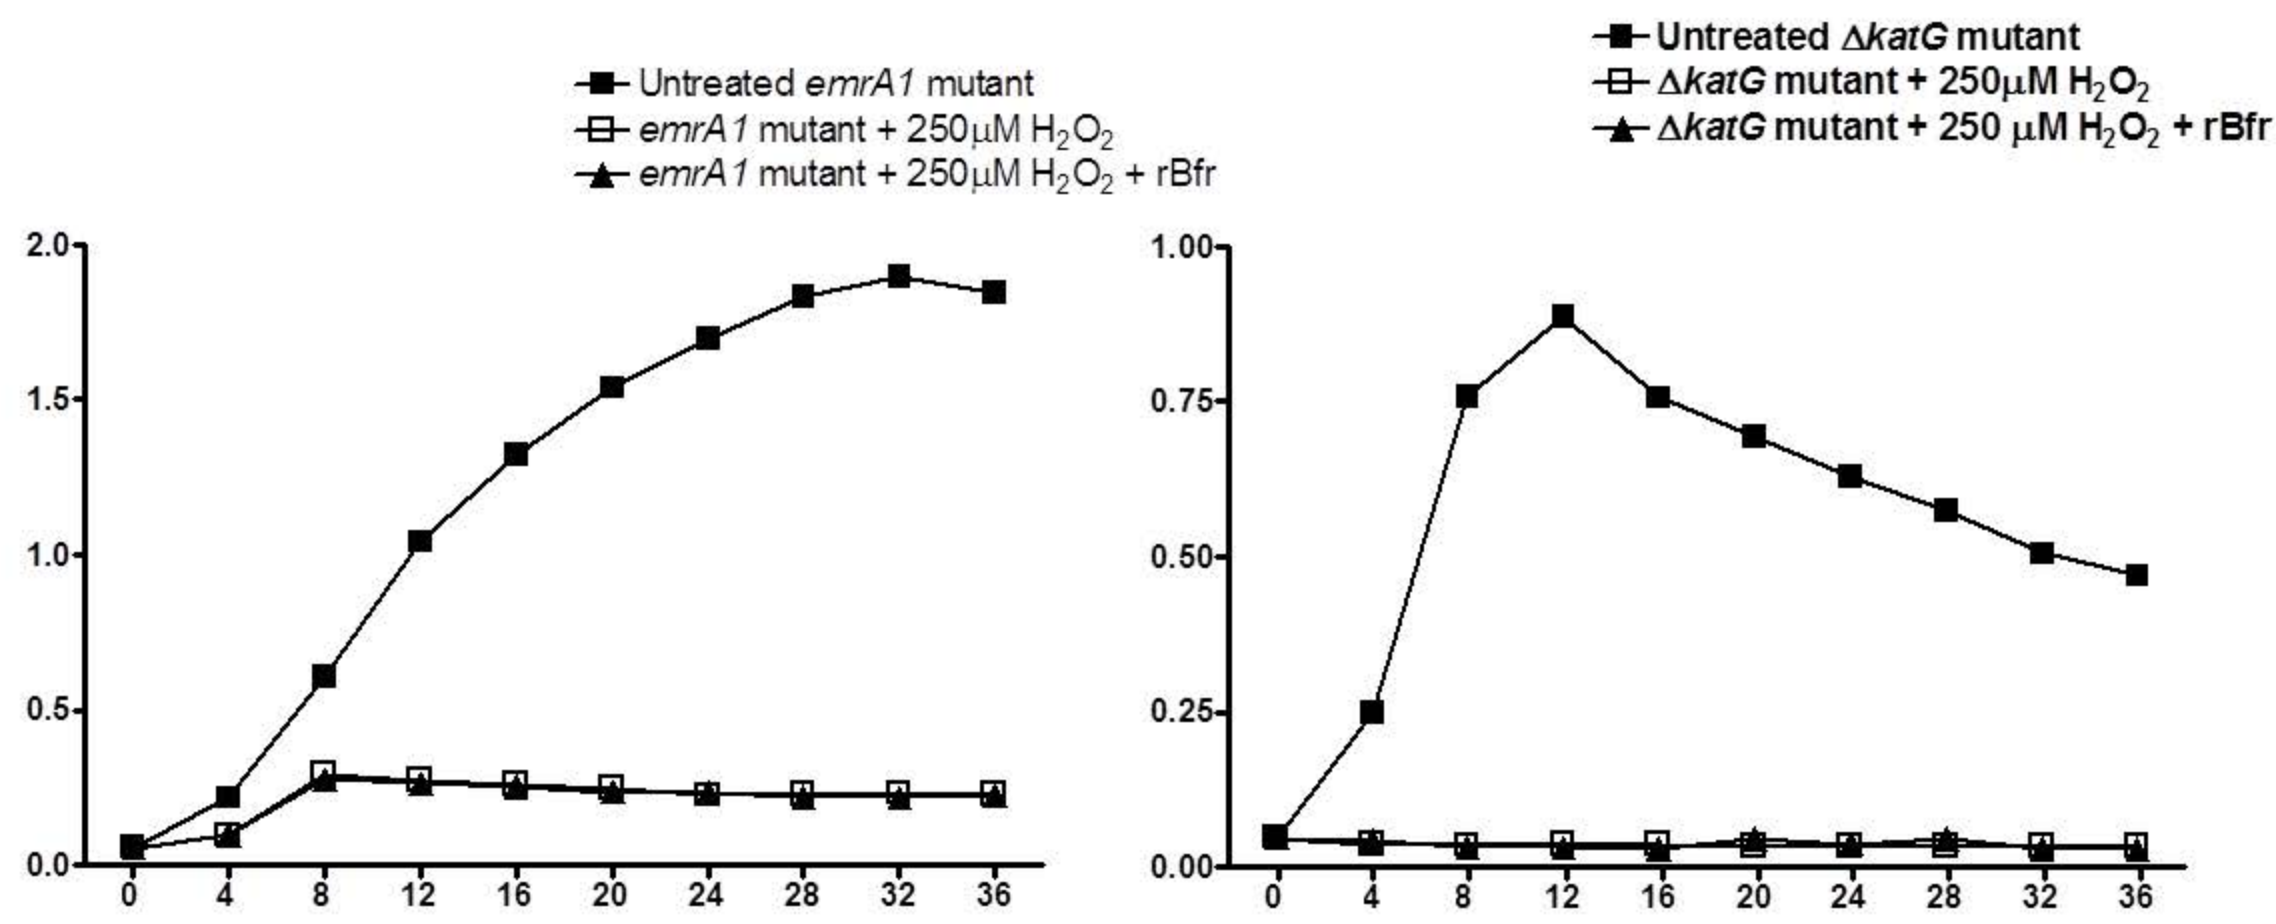

**Fig. S3:** Growth curves of *F. tularensis* (*Ft*) LVS and the *emrA1* mutant (B) and  $\Delta katG$  mutant (C) in the absence or presence of 250 μM of H<sub>2</sub>O<sub>2</sub> and with or without the addition of recombinant bacteroferritin (rBfr). The cultures were grown for 24 hrs and OD<sub>600</sub> readings were recorded every 4 hrs

# Figure S4

**A**

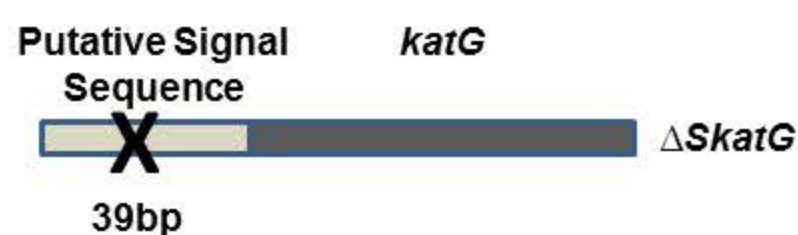

**B**

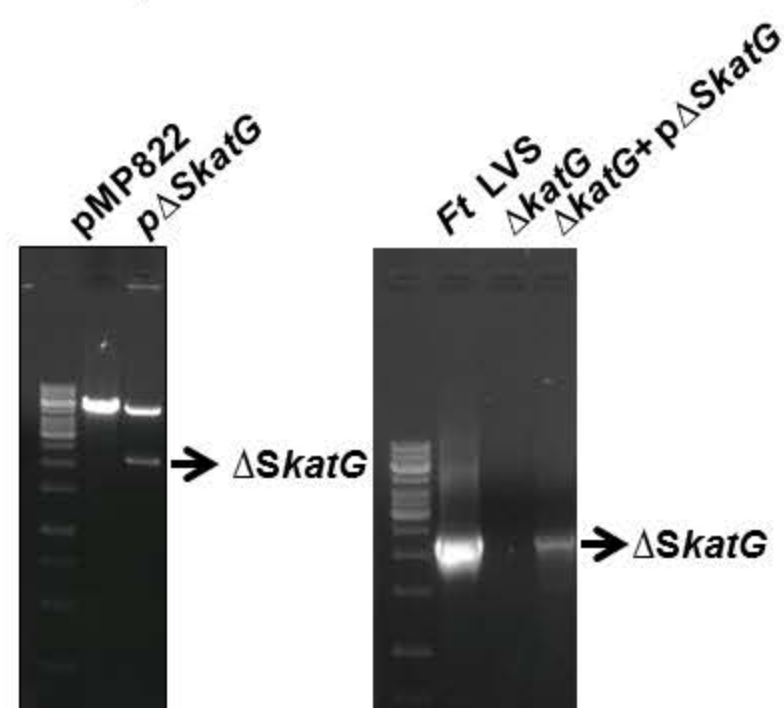

**C**

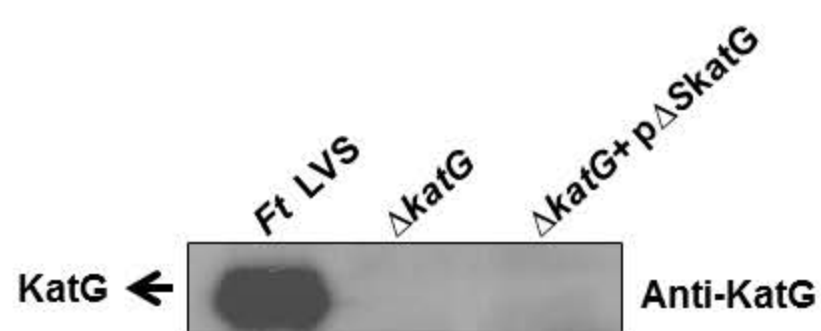

**D**

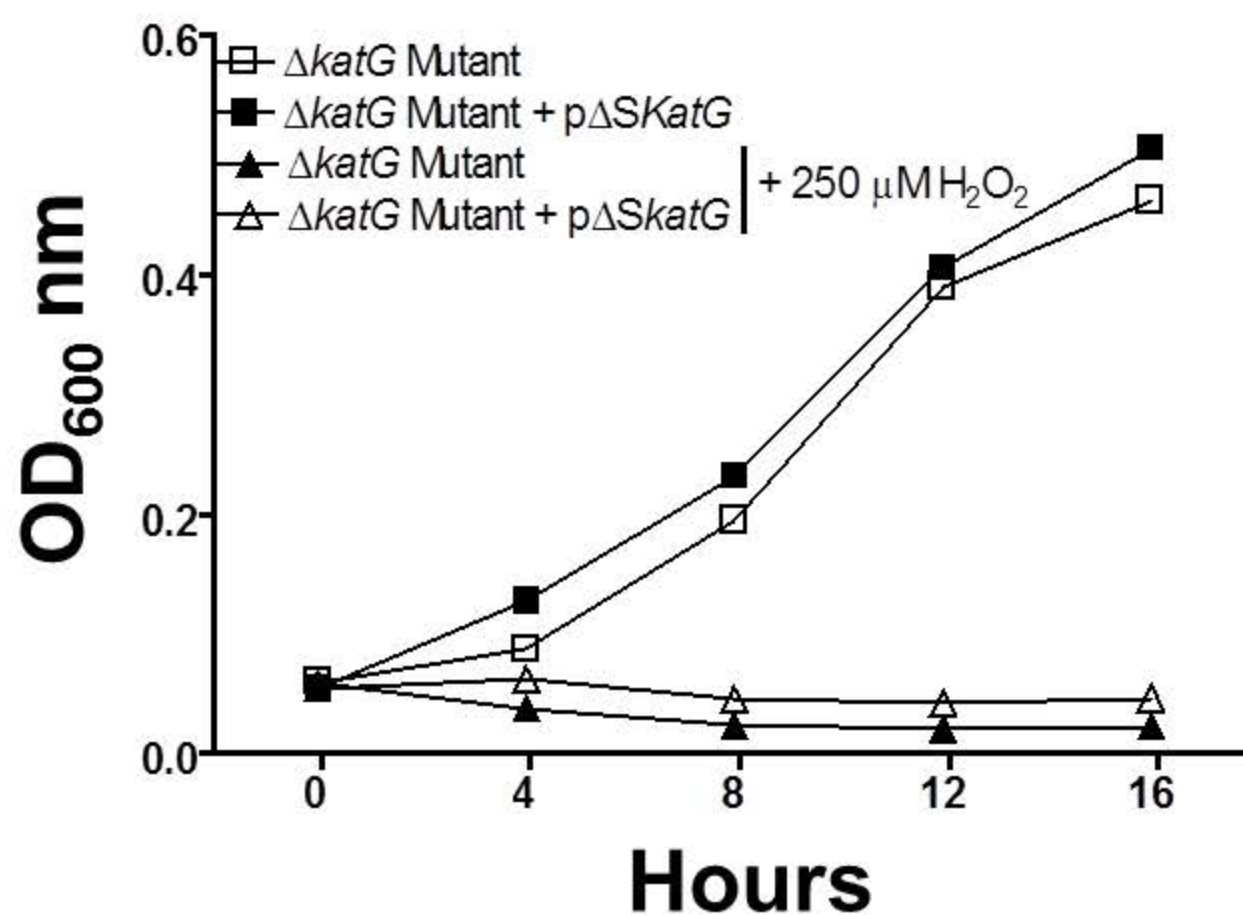

**Fig. S4:** Signal sequence is required for the expression of KatG in *F. tularensis* LVS. (A) Schematic representation of the strategy used for generation of *katG* transcomplement strain. The *katG* gene was amplified using LVS genomic DNA as a template employing primers KatG *PstI* F (GCATGCCTGCAGATGCTACTAGCTTCTAGCAATGC) and KatG *XhoI* R (GCATGCCTCGAGTTATTGTTGAACATCAAATCTGCC). The first 39 nucleotides of the *katG* gene at 5' end which spans the putative signal sequence were excluded. The PCR product was digested with *PstI* and *XhoI* and ligated into similarly digested pMP822 plasmid. (B) Confirmation of *katG* transcomplement strain. Left gel represents the release of *katG* insert after restriction enzyme digestion of pΔ*SkatG* with *PstI* and *XhoI*. The pMP822 plasmid was used as vector control. Right gel represents PCR of LVS parent strain, Δ*katG* and Δ*katG* + pΔ*SkatG* strains. Primers are specific for a region within *katG* gene to confirm the presence of *katG*. (C) Western blot analysis of Δ*SkatG* transcomplement strain. Cell lysates were prepared from LVS parent strain, Δ*katG* and Δ*katG* + pΔ*SkatG* strains. The blot was probed with anti-KatG antibody to identify KatG protein. (D) Growth curve of Δ*katG* and Δ*katG* + pΔ*SkatG* strains in presence or absence of H<sub>2</sub>O<sub>2</sub>. The graph represents A<sub>600</sub> measurements of Δ*katG* and Δ*katG* + pΔ*SkatG* strains following 16 hours of treatment with 250 μM of H<sub>2</sub>O<sub>2</sub>.

Figure S5

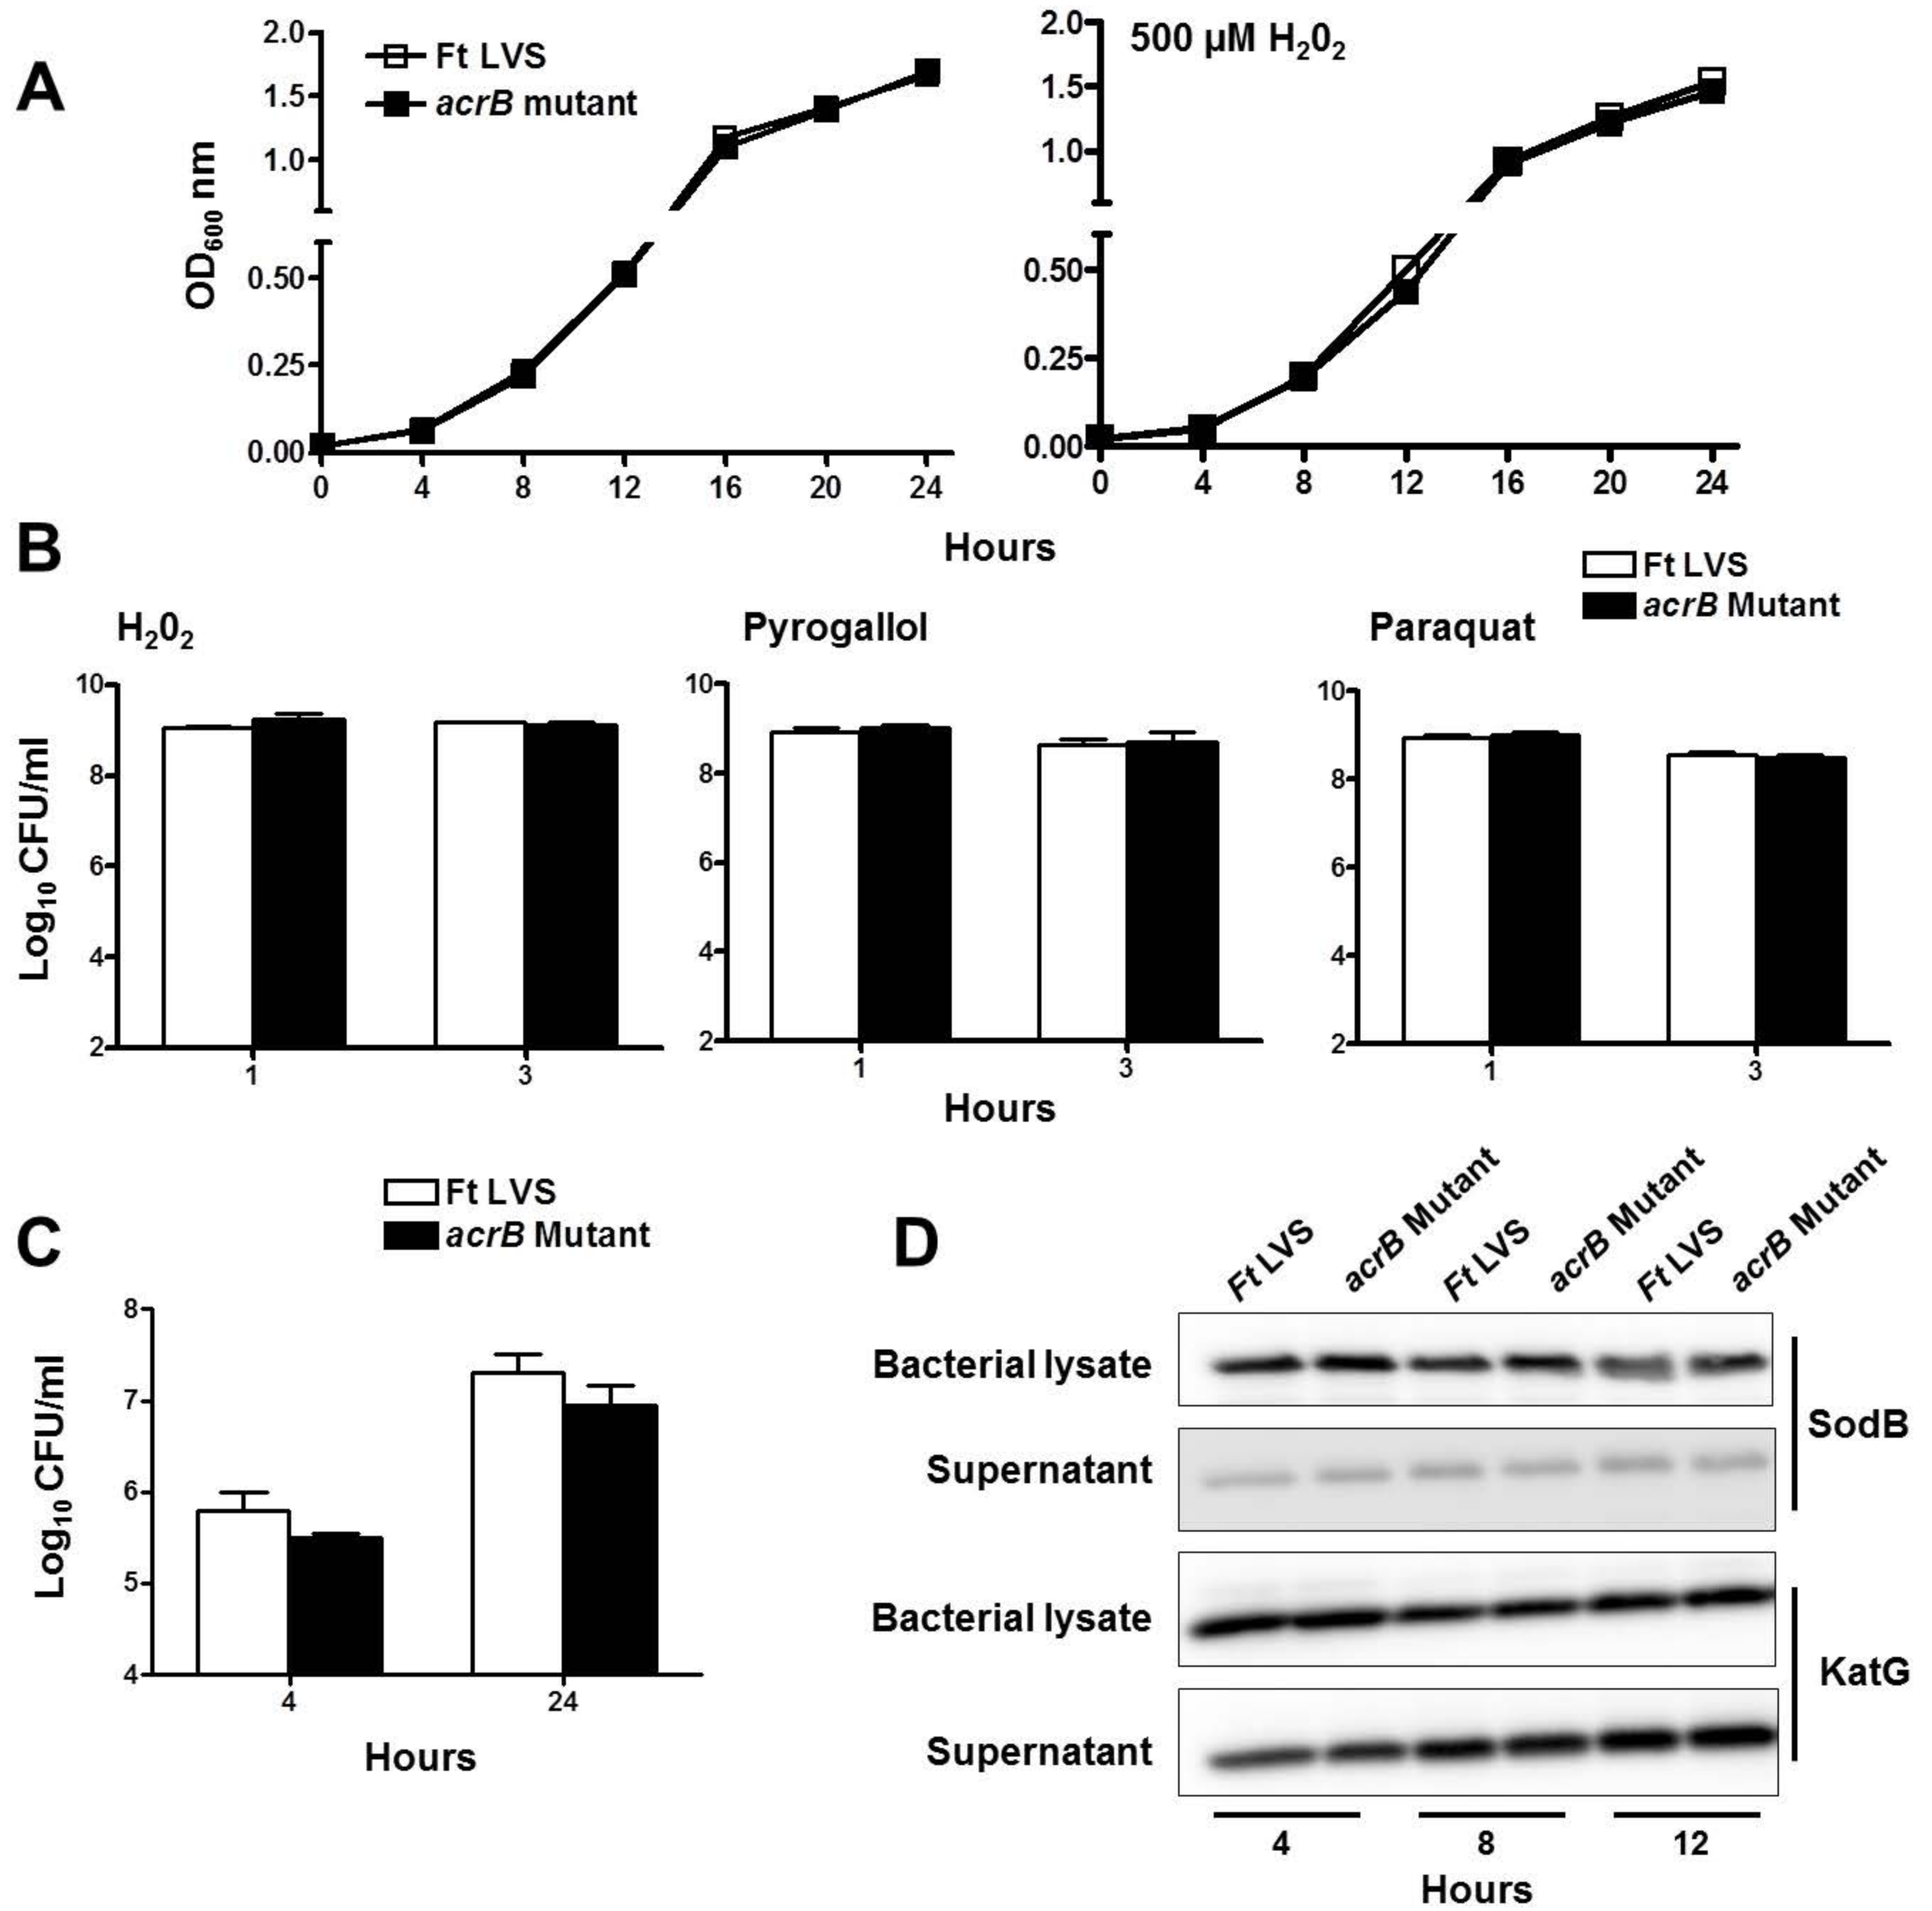

**Fig. S5:** Membrane fusion protein AcrB of RND multidrug efflux pump is not required for resistance to oxidants and secretion of antioxidant enzymes SodB and katG.

(A) Growth curves of *F. tularensis* (Ft) LVS and the *acrB* mutant in the absence or presence of 500 $\mu$ M of H<sub>2</sub>O<sub>2</sub>. The cultures were grown for 24 hrs and OD<sub>600</sub> readings were recorded every 4 hrs.

(B) The bacterial killing assay. The *F. tularensis* LVS or the *acrB* mutant cultures were exposed to 1mM of hydrogen peroxide, 1mM Paraquat or 1 mM Pyrogallol for 1 and 3 hrs (n=3). The cultures were diluted 10-fold and plated on MH-chocolate agar plates for bacterial enumeration. The results are expressed as Log<sub>10</sub> CFU/ml.

(C) Macrophage invasion assay. Murine BMDMs derived from wild type C57BL/6 were infected with Ft LVS or the *acrB* mutant at 100 MOI. The cells were lysed at 4 and 24 hrs and plated on MH-chocolate agar plates for enumeration of bacterial CFU (n=3 biological replicates).

(D) The culture filtrates or the lysates of the bacterial pellet of Ft LVS or the *acrB* mutant grown in BHI broth were analyzed at the indicated times by western blot analysis using anti-SodB and anti-KatG antibodies.
